## CORRIGENDUM

## Familial paroxysmal kinesigenic dyskinesia is associated with mutations in the *KCNA1* gene

Xiao-Meng Yin<sup>1,†</sup>, Jing-Han Lin<sup>2,†</sup>, Li Cao<sup>3</sup>, Tong-Mei Zhang<sup>4,5</sup>, Sheng Zeng<sup>1</sup>, Kai-Lin Zhang<sup>1</sup>, Wo-Tu Tian<sup>3</sup>, Zheng-Mao Hu<sup>6</sup>, Nan Li<sup>1,8</sup>, Jun-Ling Wang<sup>1,6,8</sup>, Ji-Feng Guo<sup>1,6,7,8</sup>, Ruo-Xi Wang<sup>6,9</sup>, Kun Xia<sup>6</sup>, Zhuo-Hua Zhang<sup>6,9,10</sup>, Fei Yin<sup>11,12</sup>, Jing Peng<sup>11,12</sup>, Wei-Ping Liao<sup>13</sup>, Yong-Hong Yi<sup>13</sup>, Jing-Yu Liu<sup>14</sup>, Zhi-Xian Yang<sup>15</sup>, Zhong Chen<sup>16,17</sup>, Xiao Mao<sup>1</sup>, Xin-Xiang Yan<sup>1</sup>, Hong Jiang<sup>1,6,7,8</sup>, Lu Shen<sup>1,6,7,8</sup>, Sheng-Di Chen<sup>3</sup>, Li-Ming Zhang<sup>2,\*,‡</sup> and Bei-Sha Tang<sup>1,6,7,8,18,19,\*,‡</sup>

<sup>1</sup>Department of Neurology, Xiangya Hospital, Central South University, Changsha, Hunan 410008, China,

<sup>2</sup>Department of Neurology, The First Affiliated Hospital of Harbin Medical University, Harbin 150001, China,

<sup>3</sup>Department of Neurology and Institute of Neurology, Ruijin Hospital, Shanghai Jiao Tong University School of Medicine, Shanghai 200025, China, <sup>4</sup>Department of Physiology, School of Basic Medicine and Tongji Medical College and <sup>5</sup>The Institute for Brain Research, Collaborative Innovation Center for Brain Science, Huazhong

University of Science and Technology, Wuhan 430030, China, <sup>6</sup>Center for Medical Genetics, School of Life Sciences, <sup>7</sup>National Clinical Research Center for Geriatric Disorders, <sup>8</sup>Key Laboratory of Hunan Province in Neurodegenerative Disorders, <sup>9</sup>Institute of Precision Medicine, Xiangya Hospital, Central South University,

Changsha, Hunan 410008, China, <sup>10</sup>Department of Neurosciences, School of Medicine, University of South China, Hengyang, Hunan 420001, China, <sup>11</sup>Department of Pediatrics, Xiangya Hospital, Central South University, Changsha, Hunan 410008, China, <sup>12</sup>Hunan Intellectual and Development Disabilities Research Center, Changsha, Hunan 410008, China, <sup>13</sup>Key Laboratory of Neurogenetics and Channelopathies of Guangdong Province and Ministry of Education of China, Department of Neurology of the Second Affiliated Hospital of Guangzhou Medical University, Institute of Neuroscience, Guangzhou Medical University,

Guangzhou 510260, China, <sup>14</sup>Key Laboratory of Molecular Biophysics of the Ministry of Education, College of Life Science and Technology and Center for Human Genome Research, Huazhong University of Science and Technology, Wuhan 430074, China, <sup>15</sup>Department of Pediatrics, Peking University First Hospital, Beijing 100034, China, <sup>16</sup>Key Laboratory of Medical Neurobiology of the Ministry of Health of China, Department of Pharmacology, College of Pharmaceutical Sciences, School of Medicine, <sup>17</sup>Epilepsy Center, Second Affiliated Hospital, School of Medicine, Zhejiang University, Hangzhou 310027, China, <sup>18</sup>Collaborative Innovation Center for Brain Science, Shanghai 200032, China and <sup>19</sup>Collaborative Innovation Center for Genetics and Development, Shanghai 200433, China

<sup>1</sup>Department of Neurology, Xiangya Hospital, Central South University, Changsha, Hunan 410008, China, <sup>2</sup>Department of Neurology, The First Affiliated Hospital of Harbin Medical University, Harbin 150001, China, <sup>3</sup>Department of Neurology and Institute of Neurology, Ruijin Hospital, Shanghai Jiao Tong University School of Medicine, Shanghai 200025, China, <sup>4</sup>Department of Physiology, School of Basic Medicine and Tongji Medical College and <sup>5</sup>The Institute for Brain Research, Collaborative Innovation Center for Brain Science, Huazhong University of Science and Technology, Wuhan 430030, China, <sup>6</sup>Center for Medical Genetics, School of Life Sciences, <sup>7</sup>National Clinical Research Center for Geriatric Disorders, <sup>8</sup>Key Laboratory of Hunan Province in Neurodegenerative Disorders, <sup>9</sup>Institute of Precision Medicine, Xiangya Hospital, Central South University, Changsha, Hunan 410008, China, <sup>10</sup>Department of Neurosciences, School of Medicine, University of South China, Hengyang, Hunan 420001, China, <sup>11</sup>Department of Pediatrics, Xiangya Hospital, Central South University, Changsha, Hunan 410008, China, <sup>12</sup>Hunan Intellectual and Development Disabilities Research Center, Changsha, Hunan 410008, China, <sup>13</sup>Key Laboratory of Neurogenetics and Channelopathies of Guangdong Province and Ministry of Education of China, Department of Neurology of the Second Affiliated Hospital of Guangzhou Medical University, Institute of Neuroscience, Guangzhou Medical University, Guangzhou 510260, China, <sup>14</sup>Key Laboratory of Molecular Biophysics of the Ministry of Education, College of Life Science and Technology and Center for Human Genome Research, Huazhong University of Science and Technology, Wuhan 430074, China, <sup>15</sup>Department of Pediatrics, Peking University First Hospital, Beijing 100034, China, <sup>16</sup>Key Laboratory of Medical Neurobiology of the Ministry of Health of China, Department of Pharmacology, College of Pharmaceutical Sciences, School of Medicine, <sup>17</sup>Epilepsy Center, Second Affiliated Hospital, School of Medicine, Zhejiang University, Hangzhou 310027, China, <sup>18</sup>Collaborative Innovation Center for Brain Science, Shanghai 200032, China and <sup>19</sup>Collaborative Innovation Center for Genetics and Development, Shanghai 200433, China

<sup>14</sup>Key Laboratory of Molecular Biophysics of the Ministry of Education, College of Life Science and Technology and Center for Human Genome Research, Huazhong University of Science and Technology, Wuhan 430074, China, <sup>15</sup>Department of Pediatrics, Peking University First Hospital, Beijing 100034, China, <sup>16</sup>Key Laboratory of Medical Neurobiology of the Ministry of Health of China, Department of Pharmacology, College of Pharmaceutical Sciences, School of Medicine, <sup>17</sup>Epilepsy Center, Second Affiliated Hospital, School of Medicine, Zhejiang University, Hangzhou 310027, China, <sup>18</sup>Collaborative Innovation Center for Brain Science, Shanghai 200032, China and <sup>19</sup>Collaborative Innovation Center for Genetics and Development, Shanghai 200433, China

<sup>16</sup>Key Laboratory of Medical Neurobiology of the Ministry of Health of China, Department of Pharmacology, College of Pharmaceutical Sciences, School of Medicine, <sup>17</sup>Epilepsy Center, Second Affiliated Hospital, School of Medicine, Zhejiang University, Hangzhou 310027, China, <sup>18</sup>Collaborative Innovation Center for Brain Science, Shanghai 200032, China and <sup>19</sup>Collaborative Innovation Center for Genetics and Development, Shanghai 200433, China

<sup>17</sup>Epilepsy Center, Second Affiliated Hospital, School of Medicine, Zhejiang University, Hangzhou 310027, China, <sup>18</sup>Collaborative Innovation Center for Brain Science, Shanghai 200032, China and <sup>19</sup>Collaborative Innovation Center for Genetics and Development, Shanghai 200433, China

<sup>18</sup>Collaborative Innovation Center for Brain Science, Shanghai 200032, China and <sup>19</sup>Collaborative Innovation Center for Genetics and Development, Shanghai 200433, China

<sup>†</sup>The authors wish it to be known that, in their opinion, the first two authors should be regarded as joint First Authors.

<sup>‡</sup>The authors wish it to be known that, in their opinion, the last two authors should be regarded as joint Last Authors.

© The Author(s) 2018. Published by Oxford University Press. All rights reserved.

For Permissions, please email: journals.permissions@oup.com

\*Correspondence to be addressed at: Department of Neurology, Xiangya Hospital, 87 of Xiangya Road, Changsha, Hunan 410008, China.  
Tel: +86 73184327398; Fax: +86 73184327332; Email: bstang7398@163.com (B.S.T); Department of Neurology, The First Affiliated Hospital of Harbin Medical University, 23 Post Street, Harbin 150001, China; Fax: +86-451-53661120; Tel: +86-451-85555026; E-mail: zfx001@yahoo.com (L.M.Z).

---

*Human Molecular Genetics* 2018; 27(4): 625–637.  
doi: 10.1093/hmg/ddx430

The authors wish to apologize for omitting the co-corresponding author status and contact details of Li-Ming Zhang. This has now been corrected in print and online.
